# Supplementary material
Source: PubMed Central journal article supplement (PMC3418723)

## Supplemental Information

### Supplemental Table 1

| Minimal Cytokines (SCF, Flt3L, TPO)                                                           | Mean (+/- s.e.m.) | Median | Range   |
|-----------------------------------------------------------------------------------------------|-------------------|--------|---------|
| <b>Cytokine Alone</b>                                                                         |                   |        |         |
| CD45+ (fold increase)                                                                         | 124 +/- 3.31      | 121    | 121-131 |
| CD45+CD34+ (fold increase)                                                                    | 54 +/- 7.29       | 59     | 39-63   |
| Lin <sup>Neg</sup> CD34 <sup>+</sup> CD45RA <sup>Neg</sup> CD49f <sup>+</sup> (fold increase) | 7 +/- 0.70        | 7      | 7-10    |
| <b>E4<sup>+</sup>ECs + cytokines</b>                                                          |                   |        |         |
| CD45+ (fold increase)                                                                         | 408 +/- 49.02     | 400    | 310-462 |
| CD45+CD34+ (fold increase)                                                                    | 148 +/- 35.32     | 136    | 94-215  |
| Lin <sup>Neg</sup> CD34 <sup>+</sup> CD45RA <sup>Neg</sup> CD49f <sup>+</sup> (fold increase) | 23 +/- 3.15       | 20     | 16-29   |

### Supplemental Figure Legend

**Supplemental Figure 1. Serum- and cytokine- free EC co-cultures supplemented with high cytokine doses of 300ng/ml SCF, 300ng/ml Flt3L, 100ng/ml TPO, 100ng/ml IL-6, and 10ng/ml IL-3 expand phenotypically marked HPCs/HSPCs and differentiated hematopoietic progenitors.**

Human umbilical CB units were enriched for CD34<sup>+</sup> cells and 5x10<sup>4</sup> CD34<sup>+</sup> cells were co-cultured with or without ECs. **A-C)** Co-cultured hematopoietic cells were cumulatively expanded. **A)** Fold expansion of total hematopoietic cells. **B)** Fold expansion of CD45<sup>+</sup>CD34<sup>+</sup> hematopoietic progenitor cells. **C)**

Fold expansion of phenotypically marked HSPCs defined by CD45<sup>+</sup> Lin<sup>neg</sup>CD34<sup>hi</sup>CD45RA<sup>neg</sup>CD49f<sup>+</sup>.

Note that human hematopoietic cells that were co-cultured with E4<sup>+</sup>ECs expanded significantly more when compared to cultures without vascular feeder cells (n = 12 p-values were calculated using Student's t-test).

# Supplemental Figure 1

## Expansion under high cytokine addition

(300ng/ml SCF; 100ng/ml TPO; 300ng/ml Flt-3L, IL-6 100ng/ml, IL-3 10ng/ml)

**A**

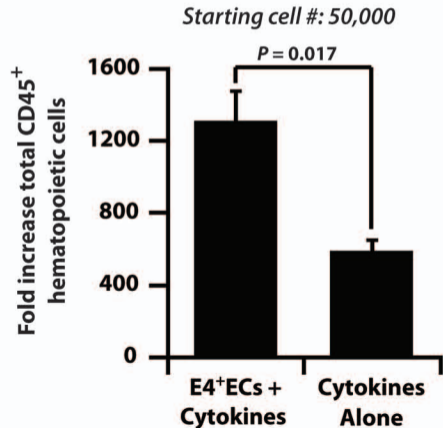

**B**

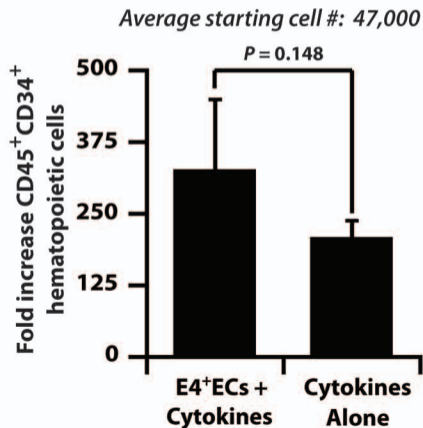

**C**

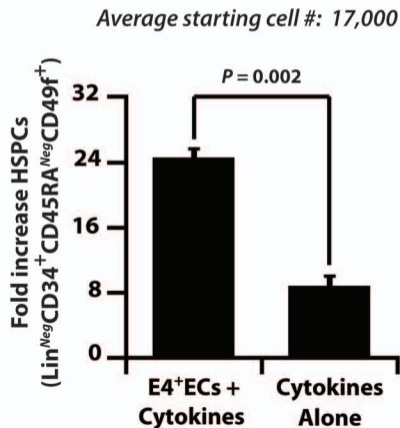

Supplement: supp_blood-2011-12-398115_blood-2011-12-398115-1.pdf [file supp_blood-2011-12-398115_blood-2011-12-398115-1.pdf]
